# Supplementary material for: Improving hospital flow ‘Ensiab Project’
Source: PubMed Central journal article supplement — BMJ Open Qual. 2021 Sep 28;10(3):e001505. doi: 10.1136/bmjoq-2021-001505 (PMC8479940; doi:10.1136/bmjoq-2021-001505), 2021-09-28
Supplement: bmjoq-2021-001505supp001.pdf [file bmjoq-2021-001505supp001.pdf]

| <b>Indicator title</b>                            | <b>Numerator</b>                                                                                                                                                               | <b>Denominator</b>                                                                                                                                                                                 | <b>Frequency</b> |
|---------------------------------------------------|--------------------------------------------------------------------------------------------------------------------------------------------------------------------------------|----------------------------------------------------------------------------------------------------------------------------------------------------------------------------------------------------|------------------|
| <i>ED boarding time</i>                           | Sum of ED boarding time (in hours) of all patients admitted through ED                                                                                                         | Number of patients who were admitted through ED over the same period                                                                                                                               | Monthly          |
| <i>Average length of stay (LOS)</i>               | Discharge days: The sum of the number of days spent in the hospital for each inpatient who was discharged during the study period regardless of when the patient was admitted. | Total discharges over the same study period                                                                                                                                                        | Monthly          |
| <i>Bed turnover rate</i>                          | Number of discharges (including deaths) in each time                                                                                                                           | Number of beds in the hospital during that time                                                                                                                                                    | Monthly          |
| <i>Length of day (LOS) outliers &gt;7days</i>     | Number of currently admitted patients exceeding 7 days Length of stay during the measurement period                                                                            | Total number of admitted patients                                                                                                                                                                  | Monthly          |
| <i>Length of stay (LOS) outliers &gt; 30 days</i> | Number of currently admitted patients exceeding 30 days Length of stay during the measurement period                                                                           | Total number of admitted patients                                                                                                                                                                  | Monthly          |
| <i>ED boarding time</i>                           | Sum of ED boarding time (in hours) of all patients admitted through ED                                                                                                         | Number of patients who were admitted through ED over the same period                                                                                                                               | Monthly          |
| <i>Median time till discharge</i>                 | Median Time from Physician order for discharge till the patient physically left his/her bed                                                                                    | N/A                                                                                                                                                                                                | Monthly          |
| <i>Early discharge planning</i>                   | Number of inpatients who have a documented early discharge planning within 24 hours of admission (indicated by screening)                                                      | Total number of admitted patients who are indicated for early discharge planning                                                                                                                   | Monthly          |
| <i>Daily consultant rounds</i>                    | Number of inpatient days with a documented round by the treating consultant including weekends                                                                                 | Total number of inpatient days during the same period <sup>2</sup>                                                                                                                                 | Monthly          |
| <i>Percent of discharges before 12:00pm</i>       | Number of inpatients that have were discharged (left the bed) before 12:00pm                                                                                                   | Total number of discharges                                                                                                                                                                         | Monthly          |
| <i>Hospital readmission within 30 days</i>        | Number of discharged patients readmitted to the hospital within 30 days                                                                                                        | Number of patients discharged from the hospital                                                                                                                                                    | Monthly          |
| <i>Bed occupancy rate</i>                         | Inpatient days of care: sum of all inpatient service days or occupied bed days.                                                                                                | Beds days: The maximum number of inpatient days of care that would have been provided if all beds were filled over a month, and is equal to (number of available beds x number of days in a month) | Monthly          |
| <i>ED mortality</i>                               | Number of patients who died within the emergency department                                                                                                                    | Total number of ED visits                                                                                                                                                                          | Monthly          |
| <i>ED patient LWBS</i>                            | Total number of patient encounters that ended with the patient leaving the healthcare setting before the patient could be seen by a certified physician                        | Total number of ED visits                                                                                                                                                                          | Monthly          |
